# Supplementary material for: Interpreting Sentinel-1 SAR Backscatter Signals of Snowpack Surface Melt/Freeze, Warming, and Ripening, through Field Measurements and Physically-Based SnowModel
Source: MDPI journal article supplement (doi:10.3390/rs14164002), 2022-08-17
Supplement: s1 [file s1]

## Supplementary Materials

**Table S1.** Pit observations used for snow pit conditions analysis and SnowModel data assimilation.

| PitID             | Date/Local Time  | Easting | Northing | Campaign    | Pit analysis | SnowModel |
|-------------------|------------------|---------|----------|-------------|--------------|-----------|
| COGMSO_20191219   | 2019-12-19T16:00 | 754270  | 4325785  | Time Series |              | x         |
| COGMCO_20191220   | 2019-12-20T10:30 | 756903  | 4324357  | Time Series |              | x         |
| COGMCO_20200122   | 2020-01-22T10:15 | 756903  | 4324357  | Time Series | x            | x         |
| COGMSO_20200122   | 2020-01-22T14:55 | 754270  | 4325785  | Time Series | x            | x         |
| COGM2N4_20200128  | 2020-01-28T11:25 | 740811  | 4324488  | IOP         |              | x         |
| COGM1N6_20200128  | 2020-01-28T13:20 | 741510  | 4324472  | IOP         |              | x         |
| COGM3N22_20200128 | 2020-01-28T13:55 | 743509  | 4324117  | IOP         |              | x         |
| COGM3N53_20200128 | 2020-01-28T15:31 | 747302  | 4323917  | IOP         | x            | x         |
| COGM2S25_20200129 | 2020-01-29T08:50 | 745161  | 4322395  | IOP         | x            | x         |
| COGM1S1_20200129  | 2020-01-29T09:05 | 741920  | 4322845  | IOP         |              | x         |
| COGM2S48_20200129 | 2020-01-29T09:10 | 747670  | 4322397  | IOP         |              | x         |
| COGM2S3_20200129  | 2020-01-29T10:35 | 742155  | 4322840  | IOP         |              | x         |
| COGM3S5_20200129  | 2020-01-29T12:10 | 742531  | 4322632  | IOP         |              | x         |
| COGM3S47_20200129 | 2020-01-29T12:56 | 747487  | 4322259  | IOP         |              | x         |
| COGM2S36_20200129 | 2020-01-29T13:38 | 745711  | 4322356  | IOP         | x            | x         |
| COGM2S35_20200130 | 2020-01-30T13:10 | 745678  | 4322446  | IOP         |              | x         |
| COGM2C33_20200130 | 2020-01-30T15:00 | 745787  | 4322066  | IOP         | x            | x         |
| COGM2C2_20200131  | 2020-01-31T09:00 | 740652  | 4327445  | IOP         | x            | x         |
| COGM2N12_20200131 | 2020-01-31T09:05 | 742466  | 4324372  | IOP         |              | x         |
| COGM2C4_20200131  | 2020-01-31T10:05 | 740839  | 4327345  | IOP         |              | x         |
| COGM1C7_20200131  | 2020-01-31T10:55 | 741378  | 4326992  | IOP         |              | x         |
| COGM1C1_20200131  | 2020-01-31T11:07 | 740508  | 4327577  | IOP         |              | x         |

|                   |                  |        |         |     |   |   |
|-------------------|------------------|--------|---------|-----|---|---|
| COGM2C9_20200131  | 2020-01-31T11:50 | 741580 | 4326713 | IOP |   | x |
| COGM2C3_20200131  | 2020-01-31T12:27 | 740765 | 4327379 | IOP |   | x |
| COGM1C14_20200131 | 2020-01-31T14:01 | 742453 | 4325752 | IOP |   | x |
| COGM2C6_20200131  | 2020-01-31T14:05 | 741132 | 4327061 | IOP |   | x |
| COGM1C8_20200131  | 2020-01-31T15:10 | 741493 | 4326833 | IOP | x | x |
| COGM2S37_20200201 | 2020-02-01T08:40 | 745937 | 4322754 | IOP | x |   |
| COGM2N48_20200201 | 2020-02-01T14:51 | 746802 | 4324222 | IOP | x |   |
| COGM2S46_20200204 | 2020-02-04T10:30 | 747466 | 4322453 | IOP | x |   |
| COGM3S33_20200204 | 2020-02-04T11:24 | 745529 | 4322471 | IOP |   |   |
| COGM3S52_20200204 | 2020-02-04T14:43 | 748777 | 4322533 | IOP |   |   |
| COGM2S27_20200204 | 2020-02-04T15:15 | 745251 | 4322588 | IOP | x |   |
| COGM2S4_20200205  | 2020-02-05T09:30 | 742304 | 4322496 | IOP | x |   |
| COGM2S10_20200205 | 2020-02-05T09:45 | 743076 | 4322689 | IOP |   |   |
| COGM2S9_20200205  | 2020-02-05T10:55 | 743083 | 4322876 | IOP |   |   |
| COGM1S13_20200205 | 2020-02-05T13:15 | 743277 | 4322508 | IOP | x |   |
| COGM1N20_20200205 | 2020-02-05T13:30 | 743281 | 4324005 | IOP |   |   |
| COGM2S20_20200206 | 2020-02-06T08:47 | 744458 | 4322697 | IOP | x | x |
| COGM2N13_20200206 | 2020-02-06T09:32 | 742685 | 4324287 | IOP |   |   |
| COGM1C1_20200208  | 2020-02-08T08:30 | 740506 | 4327589 | IOP | x | x |
| COGM1N1_20200208  | 2020-02-08T08:56 | 740503 | 4324293 | IOP |   | x |
| COGM1S2_20200208  | 2020-02-08T09:37 | 742115 | 4322712 | IOP |   | x |
| COGM2N8_20200208  | 2020-02-08T09:51 | 742054 | 4324454 | IOP |   | x |
| COGM2S7_20200208  | 2020-02-08T11:35 | 742605 | 4322584 | IOP |   | x |
| COGM3N26_20200208 | 2020-02-08T13:25 | 743728 | 4324258 | IOP |   | x |
| COGM2S16_20200208 | 2020-02-08T14:05 | 743950 | 4322638 | IOP |   | x |

|                     |                  |        |         |             |   |   |
|---------------------|------------------|--------|---------|-------------|---|---|
| COGM1S17_20200208   | 2020-02-08T15:30 | 743987 | 4322748 | IOP         | x | x |
| COGM2S45_20200210   | 2020-02-10T08:44 | 747316 | 4322396 | IOP         | x | x |
| COGM2N49_20200210   | 2020-02-10T15:16 | 746800 | 4323946 | IOP         | x | x |
| COGM1S12_20200211   | 2020-02-11T09:17 | 743158 | 4322557 | IOP         | x | x |
| COGM1N3_20200211    | 2020-02-11T11:08 | 740759 | 4324208 | IOP         |   | x |
| COGM2S6_20200211    | 2020-02-11T11:25 | 742602 | 4322943 | IOP         |   |   |
| COGM2N14_20200211   | 2020-02-11T13:00 | 742850 | 4324221 | IOP         |   | x |
| COGM1N7_20200211    | 2020-02-11T13:40 | 741866 | 4324050 | IOP         |   | x |
| COGM2N21_20200211   | 2020-02-11T15:00 | 743466 | 4324104 | IOP         |   | x |
| COGM1N5_20200211    | 2020-02-11T15:04 | 741369 | 4324492 | IOP         |   | x |
| COGM1N23_20200211   | 2020-02-11T15:50 | 743548 | 4324077 | IOP         | x | x |
| COGM2C12_20200212   | 2020-02-12T08:48 | 742229 | 4326414 | IOP         | x | x |
| COGMCO_20200212     | 2020-02-12T08:52 | 756903 | 4324357 | Time Series |   | x |
| COGM2C13_20200212   | 2020-02-12T10:12 | 742229 | 4326011 | IOP         |   | x |
| COGM1C5_20200212    | 2020-02-12T11:26 | 740919 | 4327334 | IOP         |   | x |
| COGMSO_20200212     | 2020-02-12T12:52 | 754270 | 4325785 | Time Series | x | x |
| COGMSO_20200225     | 2020-02-25T15:00 | 754270 | 4325785 | Time Series | x |   |
| COGMCO_20200226     | 2020-02-26T07:15 | 756903 | 4324357 | Time Series | x |   |
| COGMCO_20200304     | 2020-03-04T09:21 | 756903 | 4324357 | Time Series | x |   |
| COGMSO_20200304     | 2020-03-04T15:50 | 754270 | 4325785 | Time Series | x |   |
| mw_o_am_030520_0809 | 2020-03-05T08:09 | 741079 | 4324261 | Pathfinder  | x |   |
| sw_o_pm_030620_1705 | 2020-03-06T17:05 | 754044 | 4325657 | Pathfinder  | x |   |
| COGMCO_20200312     | 2020-03-12T09:50 | 756903 | 4324357 | Time Series | x |   |
| sw_o_pm_031220_1622 | 2020-03-12T16:22 | 754269 | 4325786 | Pathfinder  | x |   |
| mw_o_am_031620_0941 | 2020-03-16T09:41 | 754268 | 4325786 | Pathfinder  | x |   |

|                     |                  |        |         |             |   |   |
|---------------------|------------------|--------|---------|-------------|---|---|
| mw_o_pm_031620_1619 | 2020-03-16T16:19 | 741085 | 4324297 | Pathfinder  | x |   |
| COGMCO_20200318     | 2020-03-18T09:25 | 756903 | 4324357 | Time Series | x |   |
| COGMCO_20200321     | 2020-03-21T10:30 | 754270 | 4325785 | Time Series | x |   |
| sw_o_am_032120_1106 | 2020-03-21T11:06 | 754267 | 4325870 | Pathfinder  |   | x |
| sw_o_am_032820_1000 | 2020-03-28T10:00 | 754310 | 4326542 | Pathfinder  | x | x |
| cl_o_am_032520_1104 | 2020-03-28T11:04 | 756903 | 4324352 | Pathfinder  |   | x |
| sw_o_pm_032820_1714 | 2020-03-28T17:14 | 754272 | 4325781 | Pathfinder  | x | x |
| mw_o_am_033120_1034 | 2020-03-31T10:34 | 741146 | 4324202 | Pathfinder  | x |   |
| mw_o_pm_033120_1630 | 2020-03-31T16:30 | 741147 | 4324210 | Pathfinder  | x | x |
| sw_o_am_040620_0750 | 2020-04-06T07:50 | 754306 | 4326535 | Pathfinder  | x | x |
| sw_o_pm_040620_1700 | 2020-04-06T17:00 | 754308 | 4326539 | Pathfinder  | x | x |
| mw_o_pm_040820_1651 | 2020-04-08T16:51 | 741161 | 4324240 | Pathfinder  | x | x |
| mw_o_am_040920_0650 | 2020-04-09T06:50 | 741161 | 4324223 | Pathfinder  | x | x |
| mw_o_pm_040920_1318 | 2020-04-09T13:18 | 741144 | 4324213 | Pathfinder  |   | x |
| mw_o_pm_040920_1715 | 2020-04-09T17:15 | 741158 | 4324242 | Pathfinder  | x | x |
| cl_o_pm_041720_1609 | 2020-04-17T16:09 | 741157 | 4324241 | Pathfinder  | x | x |
| sw_o_pm_041920_1700 | 2020-04-19T17:00 | 754287 | 4325780 | Pathfinder  | x | x |
| sw_o_am_042120_0653 | 2020-04-21T06:53 | 754258 | 4325768 | Pathfinder  | x | x |
| sw_o_pm_042120_1726 | 2020-04-21T17:26 | 754258 | 4325772 | Pathfinder  | x | x |
| sw_o_pm_042220_1612 | 2020-04-22T16:12 | 754251 | 4325772 | Pathfinder  | x |   |
| sw_o_pm_042220_1612 | 2020-04-22T16:12 | 754251 | 4325772 | Pathfinder  |   | x |
| sw_o_am_050320_0702 | 2020-05-03T07:02 | 754242 | 4325757 | Pathfinder  | x | X |
| sw_o_pm_050320_1910 | 2020-05-03T19:10 | 754242 | 4325761 | Pathfinder  | x | X |
| mw_o_am_033120_1034 | 2020/03/31T10:34 | 741146 | 4324202 | Pathfinder  |   | x |

**Table S2.** Sentinel-1 data used. Images in bold are used to create the reference image.

| Filename                                                            | Date     | Orbit      |
|---------------------------------------------------------------------|----------|------------|
| S1B_IW_GRDH_1SDV_20190709T010936_20190709T011001_017050_02013B_7853 | 7/8/19   | Ascending  |
| S1A_IW_GRDH_1SDV_20190708T131810_20190708T131835_028026_032A4A_C2C4 | 7/8/19   | Descending |
| S1B_IW_GRDH_1SDV_20190721T010937_20190721T011002_017225_020651_23A9 | 7/20/19  | Ascending  |
| S1A_IW_GRDH_1SDV_20190720T131811_20190720T131836_028201_032F90_8269 | 7/20/19  | Descending |
| S1B_IW_GRDH_1SDV_20190802T010937_20190802T011002_017400_020B89_DF67 | 8/1/19   | Ascending  |
| S1A_IW_GRDH_1SDV_20190801T131811_20190801T131836_028376_0334E6_8F20 | 8/1/19   | Descending |
| S1B_IW_GRDH_1SDV_20190814T010938_20190814T011003_017575_0210E8_90B4 | 8/13/19  | Ascending  |
| S1A_IW_GRDH_1SDV_20190813T131813_20190813T131837_028551_033A9B_D5E1 | 8/13/19  | Descending |
| S1B_IW_GRDH_1SDV_20190826T010939_20190826T011004_017750_021663_E38A | 8/25/19  | Ascending  |
| S1A_IW_GRDH_1SDV_20190825T131813_20190825T131838_028726_0340A6_4872 | 8/25/19  | Descending |
| S1B_IW_GRDH_1SDV_20190907T010939_20190907T011004_017925_021BCA_FA55 | 9/6/19   | Ascending  |
| S1A_IW_GRDH_1SDV_20190906T131814_20190906T131839_028901_0346C1_22F8 | 9/6/19   | Descending |
| S1B_IW_GRDH_1SDV_20190919T010940_20190919T011005_018100_022143_AAC0 | 9/18/19  | Ascending  |
| S1A_IW_GRDH_1SDV_20190918T131814_20190918T131839_029076_034CCF_8BC6 | 9/18/19  | Descending |
| S1B_IW_GRDH_1SDV_20191001T010940_20191001T011005_018275_0226A6_0FDD | 9/30/19  | Ascending  |
| S1A_IW_GRDH_1SDV_20190930T131815_20190930T131840_029251_0352D6_E0CA | 9/30/19  | Descending |
| S1B_IW_GRDH_1SDV_20191013T010940_20191013T011005_018450_022C1F_36A8 | 10/12/19 | Ascending  |
| S1A_IW_GRDH_1SDV_20191012T131815_20191012T131840_029426_0358D7_B2F8 | 10/12/19 | Descending |
| S1B_IW_GRDH_1SDV_20191025T010940_20191025T011005_018625_023176_C3E5 | 10/24/19 | Ascending  |
| S1A_IW_GRDH_1SDV_20191024T131814_20191024T131839_029601_035ED9_DAA2 | 10/24/19 | Descending |
| S1B_IW_GRDH_1SDV_20191106T010940_20191106T011005_018800_02370F_FD7A | 11/5/19  | Ascending  |
| S1A_IW_GRDH_1SDV_20191105T131815_20191105T131840_029776_0364FB_60D7 | 11/5/19  | Descending |

|                                                                     |          |            |
|---------------------------------------------------------------------|----------|------------|
| S1B_IW_GRDH_1SDV_20191118T010940_20191118T011005_018975_023CC1_6172 | 11/17/19 | Ascending  |
| S1A_IW_GRDH_1SDV_20191117T131815_20191117T131840_029951_036B1F_33D0 | 11/17/19 | Descending |
| S1B_IW_GRDH_1SDV_20191130T010940_20191130T011005_019150_02424E_DD1D | 11/29/19 | Ascending  |
| S1A_IW_GRDH_1SDV_20191129T131814_20191129T131839_030126_03712F_DE0C | 11/29/19 | Descending |
| S1B_IW_GRDH_1SDV_20191212T010939_20191212T011004_019325_0247E1_FBED | 12/11/19 | Ascending  |
| S1A_IW_GRDH_1SDV_20191211T131814_20191211T131839_030301_037735_C13A | 12/11/19 | Descending |
| S1B_IW_GRDH_1SDV_20191224T010939_20191224T011004_019500_024D70_FA02 | 12/23/19 | Ascending  |
| S1A_IW_GRDH_1SDV_20191223T131813_20191223T131838_030476_037D42_8E3A | 12/23/19 | Descending |
| S1B_IW_GRDH_1SDV_20200105T010938_20200105T011003_019675_025301_B53F | 1/4/20   | Ascending  |
| S1A_IW_GRDH_1SDV_20200104T131813_20200104T131838_030651_03834B_6A1C | 1/4/20   | Descending |
| S1B_IW_GRDH_1SDV_20200117T010938_20200117T011003_019850_025891_F1C8 | 1/16/20  | Ascending  |
| S1A_IW_GRDH_1SDV_20200116T131812_20200116T131837_030826_038969_E6FF | 1/16/20  | Descending |
| S1B_IW_GRDH_1SDV_20200129T010937_20200129T011002_020025_025E2E_144D | 1/28/20  | Ascending  |
| S1A_IW_GRDH_1SDV_20200128T131812_20200128T131837_031001_038F93_A88D | 1/28/20  | Descending |
| S1B_IW_GRDH_1SDV_20200210T010937_20200210T011002_020200_0263E1_8F2C | 2/9/20   | Ascending  |
| S1A_IW_GRDH_1SDV_20200209T131811_20200209T131836_031176_0395AB_AB82 | 2/9/20   | Descending |
| S1B_IW_GRDH_1SDV_20200222T010937_20200222T011002_020375_02697B_3BDB | 2/21/20  | Ascending  |
| S1A_IW_GRDH_1SDV_20200221T131811_20200221T131836_031351_039BB0_BE85 | 2/21/20  | Descending |
| S1B_IW_GRDH_1SDV_20200305T010937_20200305T011002_020550_026F12_CCFE | 3/4/20   | Ascending  |
| S1A_IW_GRDH_1SDV_20200304T131811_20200304T131836_031526_03A1C0_915A | 3/4/20   | Descending |
| S1B_IW_GRDH_1SDV_20200317T010937_20200317T011002_020725_0274A1_0B86 | 3/16/20  | Ascending  |
| S1A_IW_GRDH_1SDV_20200316T131811_20200316T131836_031701_03A7CE_F347 | 3/16/20  | Descending |
| S1B_IW_GRDH_1SDV_20200329T010937_20200329T011002_020900_027A23_2AB6 | 3/28/20  | Ascending  |
| S1A_IW_GRDH_1SDV_20200328T131811_20200328T131836_031876_03ADF5_7618 | 3/28/20  | Descending |
| S1B_IW_GRDH_1SDV_20200410T010937_20200410T011002_021075_027FB0_144D | 4/9/20   | Ascending  |

|                                                                     |         |            |
|---------------------------------------------------------------------|---------|------------|
| S1A_IW_GRDH_1SDV_20200409T131812_20200409T131837_032051_03B426_DCE8 | 4/9/20  | Descending |
| S1B_IW_GRDH_1SDV_20200422T010938_20200422T011003_021250_028536_9431 | 4/21/20 | Ascending  |
| S1A_IW_GRDH_1SDV_20200421T131812_20200421T131837_032226_03BA4B_5765 | 4/21/20 | Descending |
| S1B_IW_GRDH_1SDV_20200504T010939_20200504T011004_021425_028AC6_E83C | 5/3/20  | Ascending  |
| S1A_IW_GRDH_1SDV_20200503T131813_20200503T131838_032401_03C074_B419 | 5/3/20  | Descending |
| S1B_IW_GRDH_1SDV_20200516T010939_20200516T011004_021600_029016_5D5E | 5/15/20 | Ascending  |
| S1A_IW_GRDH_1SDV_20200515T131814_20200515T131839_032576_03C5F1_415F | 5/15/20 | Descending |
| S1B_IW_GRDH_1SDV_20200528T010940_20200528T011005_021775_029543_8791 | 5/27/20 | Ascending  |
| S1A_IW_GRDH_1SDV_20200527T131814_20200527T131839_032751_03CB3E_0754 | 5/27/20 | Descending |
| S1B_IW_GRDH_1SDV_20200609T010941_20200609T011006_021950_029A81_E39D | 6/8/20  | Ascending  |
| S1A_IW_GRDH_1SDV_20200608T131815_20200608T131840_032926_03D065_2B8B | 6/8/20  | Descending |
| S1B_IW_GRDH_1SDV_20200621T010941_20200621T011006_022125_029FD3_31CA | 6/20/20 | Ascending  |
| S1A_IW_GRDH_1SDV_20200620T131816_20200620T131841_033101_03D5B3_6D8F | 6/20/20 | Descending |

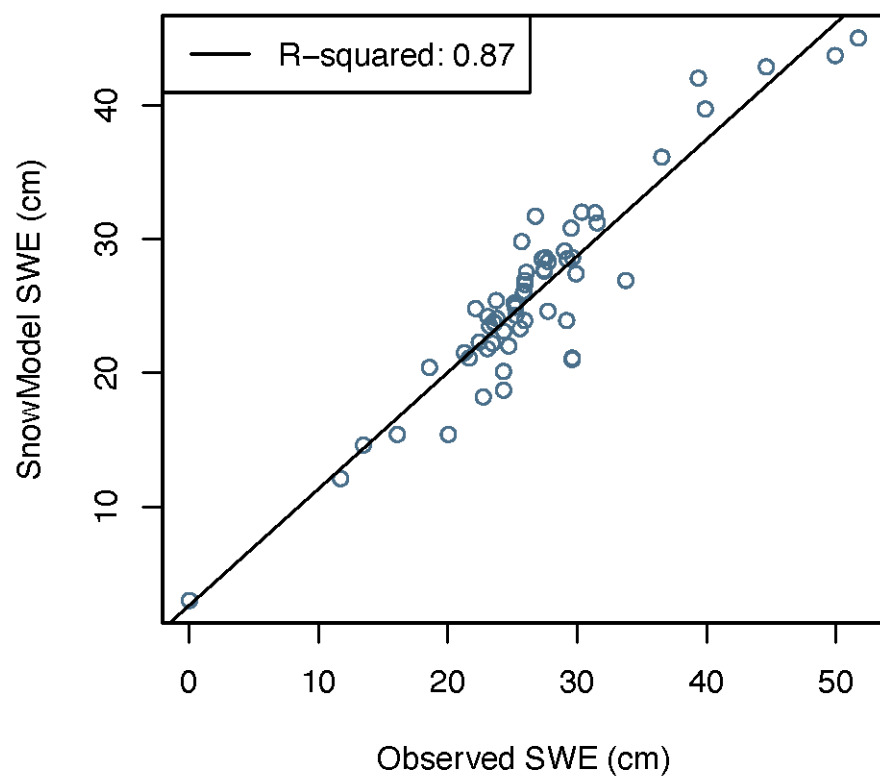

**Figure S1.** Comparison of SnowModel simulated and field-measured SWE. Adjusted R-squared of 0.87.
